1 **Title**

2

3 Single-cell transcriptomics of dynamic cell behaviors

4

5

6 **Authors**

7 Sheldon J.J. Kwok,<sup>1,2,3,\*</sup> Daniel T. Montoro,<sup>4,5\*</sup> Adam L. Haber,<sup>6\*</sup> Seok-Hyun Yun,<sup>1,2†</sup>

8 Vladimir Vinarsky<sup>7,8,9†</sup>

9

10

11 **Affiliations**

12 <sup>1</sup> Harvard Medical School and Wellman Center for Photomedicine, Massachusetts  
13 General Hospital, 65 Landsdowne St., Cambridge, MA 02139, USA.

14 <sup>2</sup> Harvard-MIT Health Sciences and Technology, Massachusetts Institute of  
15 Technology, Cambridge, MA 02139, USA.

16 <sup>3</sup> LASE Innovation Inc., Cambridge, MA 02140, USA.

17 <sup>4</sup> Broad Institute of MIT and Harvard, Cambridge, MA, 02142, USA.

18 <sup>5</sup> Department of Systems Biology, Harvard Medical School, Boston, MA, 02115, USA.

19 <sup>6</sup> Department of Environmental Health, Harvard T. H. Chan School of Public Health,  
20 Boston, MA, 02115 USA.

21 <sup>7</sup> Center for Regenerative Medicine, Massachusetts General Hospital, Boston, MA,  
22 02114, USA.

23 <sup>8</sup> Division of Pulmonary and Critical Care Medicine, Department of Medicine,  
24 Massachusetts General Hospital, Boston, MA, USA.

25 <sup>9</sup> Vertex Pharmaceuticals Incorporated, Boston, MA, USA.

26

27 \* These authors contributed equally

28 † Correspondence to [syun@hms.harvard.edu](mailto:syun@hms.harvard.edu) or [vvinarsky@mgh.harvard.edu](mailto:vvinarsky@mgh.harvard.edu)

29

30

31 **Abstract**

32

33 Despite advances in spatial transcriptomics, the molecular profiling of dynamic  
34 behaviors of cells in their native environment remains a major challenge. We present a  
35 method, termed behavioral transcriptomics, that allows us to couple physiological  
36 behaviors of single cells in an intact tissue to deep molecular profiling of individual cells.  
37 This method enabled us to establish a novel molecular signature for a striking migratory  
38 cellular behavior following tissue injury.

39

40 **Introduction**

41

42 Cells in a living organism are dynamic entities, changing their characteristics over space  
43 and time and constantly interacting with the host and pathogens. The ability to obtain  
44 such information and link it to detailed molecular phenotypes of the cells would be  
45 highly useful for biomedical investigations but has been underappreciated. Here, we  
46 present a method that allows us to characterize complex physiologic behaviors of single  
47 cells in an intact tissue and then perform live imaging-guided sequencing of the cells.  
48 We validate this approach using a regeneration model of airway tissues and  
49 demonstrate how this method leads to new biological findings.

50 There is pressing need for a comprehensive understanding of cellular behaviors in the  
51 lung, the site where aberrant cellular behavior has been linked to asthma (Kim et al.,  
52 2020; Park et al., 2015) pulmonary fibrosis (Fukumoto et al., 2016), and viral infections  
53 including influenza and coronaviruses (Kumar et al., 2011). Single-cell RNA-sequencing  
54 (scRNA-seq) has emerged as a precise way to define cell type and cell state, and new  
55 techniques are being developed to determine the spatial distribution of sequenced cells  
56 in tissues (Marx, 2021). However, the molecular pathways that drive the cellular  
57 behavior *in situ* continue to be inferred from time-lapse tissue sampling or transcriptional  
58 kinetics (La Manno et al., 2018). Moving beyond inference requires coupling visualized  
59 *in situ* cell behavior with deep molecular profiling of visualized cells.

60 Live cell imaging is an established technique for capturing morphology and cellular  
61 dynamics such as cellular migration during skin regeneration (Park et al., 2019, 2017),  
62 but imaging in the lung remains challenging due to difficult access and the constant  
63 motion of the respiratory system. Additionally, molecular information that accompanies  
64 live imaging is largely limited to a few fluorescent reporters. Prior attempts to link deep  
65 molecular profiling with live imaging have relied on imaging dissociated cells (Lane et  
66 al., 2017; Yuan et al., 2018), cell monolayers (Hu et al., 2020) or organoids (Konen et  
67 al., 2017) rather than cell behaviors in their native tissue environment.

68

## 69 Results

70

71 We describe a novel approach to linking live tissue imaging with single cell profiling  
72 (Figure 1a). In order to visualize the airway epithelium at high resolution over days, we  
73 explant a mouse trachea and secure it in a custom imaging platform, which minimizes  
74 sample movement during imaging and maintains a constant supply of nutrients from  
75 below the explant without disrupting the air-liquid interface (Figure 1a and Figure 1 –  
76 supplement figure 1a). This platform allows us to image common and rare cell types in  
77 the airway epithelium at high resolution in their native environment (Figure 1 –  
78 supplement figure 1b). The explant culture also allows an uninjured tracheal epithelium  
79 to survive with its native cellular anatomy for weeks with daily high-resolution imaging  
80 (Figure 1 – supplement figure 1c).

81 Discernable cell behaviors have a broad time scale, ranging from milliseconds to days.  
82 Thus, we imaged a wide range of cellular behaviors from rapid fluctuations of ciliary  
83 beating and directional mucociliary transport over milliseconds to wholesale  
84 regeneration of the airway epithelium, which occurs over days after the injury (Figure 1,  
85 c to f). Furthermore, this method allows single-cell level registration within tissues that  
86 are live-imaged and subsequently fixed and stained, which enables a unique

87 comparison between live fluorescence cellular patterns and immunostains that describe  
88 cell identity and function (Figure 1 – supplement figure 1d).

89 Remarkably, this airway imaging platform faithfully recapitulates and captures cellular  
90 dynamics of epithelial regeneration from native basal stem cells after an extensive  
91 epithelial injury (Figure 1f and Figure 2 – supplement figure 1) induced by sulfur dioxide  
92 (SO<sub>2</sub>). In the first 5 days, the basal cells divide, increasing cellular density and reforming  
93 the pseudostratified epithelium. In the next 5-10 days, the epithelium differentiates,  
94 leading to restoration of the full epithelium, including the regeneration of ciliated cells.  
95 Complete regeneration requires an air-liquid interface (Figure 1f). Overall, this murine  
96 trachea explant ALI culture retains the nearly complete 3D organization and  
97 microenvironment of the basal progenitor cells and, therefore, offers a unique model to  
98 study organ physiology and regeneration outside of the body.

99 Continuous time-lapse imaging of the airway epithelium for up to 80 hours after injury  
100 (Figure 2a and Figure 2 – supplement figure 2a and Movie 1) demonstrated changes in  
101 cellular architecture over time, including an increase in the average cellular density and  
102 epithelial thickness, without apparent phototoxicity (Figure 2 – supplement figure 2a).  
103 We examined cell movement using single-cell tracking following segmentation of cell  
104 nuclei and particle image velocimetry (PIV) of non-segmented images (Figure 2 –  
105 supplement figure 2b and c). These analyses revealed a variety of regeneration cellular  
106 dynamics inaccessible without live imaging. For example, Hertwig's Rule predicts that a  
107 cell division plane is perpendicular to the long axis of the cell during the preceding  
108 interphase (Minc and Piel, 2012). This was established in plants (Besson and Dumais,  
109 2011) and developing simple model organisms (Aigouy et al., 2010; Concha and  
110 Adams, 1998; Tsou et al., 2003) but has never been probed in an adult regenerating  
111 tissue. We found that the long axis in most cells predicts the cell division axis, while the  
112 axis of cellular movement prior to cell division does not (Figure 1e and Figure 2 –  
113 supplement figure 3a and b).

114 We also found a surprising degree of heterogeneity of collective cellular migration  
115 during regeneration throughout the injured airways. In regions that demonstrated rapid  
116 cellular movement after injury, the movement peaked at 26-38 hours after SO<sub>2</sub> injury  
117 and the speed declined significantly in most regions by 50 hours after injury (Figure 2c).  
118 There was a significant interaction between time and the mean speed, but no significant  
119 difference between mouse and mean speed (Figure 2c). Variable migratory behavior of  
120 airway epithelial cells has been observed in cell culture models (Kim et al., 2020; Park  
121 et al., 2015) but not previously in an intact regenerating airway tissue. We found that the  
122 frequency distribution of cellular speed in different regions at 26-38 hours demonstrated  
123 large variability ranging from “non-mover” regions (< 1.5 μm/hr) to “mover” regions (> 4  
124 μm/hr) (Figure 2d). Furthermore, videos with higher temporal resolution revealed that  
125 the cells with slower movements in the “non-mover” regions had no directional  
126 preference, whereas the “mover” regions with faster cellular movements were more uni-  
127 directional (Figure 2 – supplement figure 3c and d and Movie 2).

128 Distinct subsets of cells have been theorized to contribute to the regeneration process  
129 (Pardo-Saganta et al., 2015a; Tadokoro et al., 2014), but it is unclear whether these  
130 heterogeneous transcriptional cell states reflect gene expression stochasticity or  
131 correlate with unique cell behaviors. To determine the molecular signatures of cells with

132 directional movement compared to regenerating non-moving cells, we marked epithelial  
133 regions by photoconversion at 24 hours after injury, imaged every 6 hours, screened for  
134 “movers” with  $>50 \mu\text{m}$  displacement ( $>3 \mu\text{m/hr}$ ) at 18 hours after photoconversion, and  
135 then isolated photoconverted epithelial cells by FACS for plate-based scRNA-seq  
136 (Figure 3a and Materials and Methods). Dimensionality reduction revealed that cells  
137 from “moving” region (M) and a “non-moving” (NM) region cluster separately (Figure  
138 3b). Using unsupervised clustering and cell identity signatures (Methods), we found that  
139 nearly all the cells in the M region are basal cells, whereas the NM region contains  
140 basal and club cells (Figure 3c). We defined the differences in gene expression  
141 between the M basal cells and NM basal cells and identified gene signatures that are  
142 enriched (FDR  $< 0.05$ , likelihood-ratio test) either in the M or the NM basal cells (Figure  
143 3c).

144 We wondered whether the identified phenotypes may be a common feature of injury-  
145 induced epithelial regeneration. We examined published data of an independent injury  
146 model (Borthwick et al., 2001) and analyzed the prevalence of these signatures during  
147 repair after polidocanol injury. As predicted, the M basal cell signature is strongly  
148 enriched 24 hours post injury (hpi), declines at 48 hpi and 72 hpi, and returns to  
149 baseline at 1 week after injury (all  $p < 10^{-16}$ , Mann-Whitney U test, Figure 4a). Similarly,  
150 the NM signature is decreased at 24 hpi when cell migration is presumed to be active,  
151 increases at 48 hpi and 72 hpi when cell migration is presumed to be diminished, and  
152 returns to baseline at 1-week post-injury when regeneration is complete (Figure 4a).  
153 Furthermore, at 24 hpi we found that scoring basal cells using M and NM signatures  
154 segregated basal cells into two statistically distinct cell populations (Figure 4b),  
155 indicating that polidocanol regeneration is likely also characterized by these cell  
156 phenotypes. To test this possibility, we used unsupervised clustering (Methods) to  
157 define two groups of basal cells at 24 hpi and found that these two populations were  
158 indeed separately enriched for the M and NM basal cell signatures (Figure 4c),  
159 confirming the presence of distinct M and NM basal cells during polidocanol  
160 regeneration. Taken together, these findings suggest that distinct M and NM cell  
161 behaviors are conserved features of early epithelial regeneration and demonstrate that  
162 our live imaging-guided single-cell profiling approach can discover generalizable  
163 principles of tissue biology.

164  
165  
166

## 167 **Discussion**

168

169 The rapid progress in spatially resolved transcriptomics is enabling the discovery and  
170 characterization of transcriptionally heterogeneous cells in diverse tissue contexts (Lee et  
171 al., 2021; Ståhl et al., 2016). However, these methods do not capture the dynamics of  
172 cell behaviors that often define the unique biological processes that occur in the tissues.  
173 To address this gap, we developed an approach to examine the association of  
174 molecular and behavioral phenotypes of single cells in their native tissues. We first  
175 established a respiratory organ explant culture that maintains tissue dynamics for an  
176 extended length of time, and subsequently combined this platform with live imaging in

177 order to observe distinct lung cellular behaviors at a broad time scale, spanning cell  
178 migration, cell division, and ciliary beating.

179 To link cell behavior to molecular analysis, we used photoconversion to mark cells that  
180 display distinct cell behaviors for subsequent single-cell genomics analysis. We found  
181 that a subpopulation of basal stem cells migrates within the lung during early  
182 regeneration. We used recently developed single-cell RNA-sequence approaches to  
183 establish molecular signatures for moving and nonmoving basal cells. Furthermore, we  
184 found these distinct cell signatures across independent lung regeneration models,  
185 suggesting that M and NM cell behaviors are likely not only conserved cellular features  
186 of early epithelial regeneration, and but also that live imaging-guided single-cell profiling  
187 approach can discover general principles of tissue biology.

188

189

## 190 **Materials and Methods**

191

### 192 ***Mice***

193

194 mT-mG (stock no. 007676), nT-nG (stock no. 023035), CAGs-LSL-rtTA3 (stock no.  
195 029617), and Col1a1-tetO-H2B-mCherry (stock no. 014602), CD11cCre (stock no.  
196 007567), and Ascl1nGFP (stock no 012881) mice were purchased from the Jackson  
197 Laboratory. Foxj1Cre (Zhang et al., 2007), KRT5rtTA(Diamond et al., 2000), B1EGFP  
198 (Miller et al., 2005), Foxj1CreER (Rawlins and Hogan, 2008), CC10CreER (Rawlins et  
199 al., 2009), and Kaede (Tomura et al., 2008) lines were previously described. A line of  
200 Membrane-GFP (mG) mice was generated by selecting GFP-positive pups of a  
201 Foxj1Cre-mTmG male parent (with mT to mG recombination in the sperm) and  
202 backcrossing to WT background to eliminate the Cre allele. The mG line without Cre  
203 was crossed to nT-nG to generate the “nT-mG” strain. Mice were maintained in an  
204 Association for Assessment and Accreditation of Laboratory Animal Care-accredited  
205 animal facility at the Massachusetts General Hospital, and procedures were performed  
206 with Institutional Animal Care and Use Committee (IACUC)-approved protocols. Mice of  
207 all strains were housed in an environment with controlled temperature and humidity, on  
208 12-hour light-dark cycles, and fed with regular rodent’s chow.

209

### 210 ***Sulfur Dioxide Injury***

211

212 Sulfur dioxide (SO<sub>2</sub>) injury model was performed as previously described (Kim et al.,  
213 2012; Pardo-Saganta et al., 2015b). In brief, mice were exposed to 500 p.p.m. of SO<sub>2</sub>  
214 for 3 h 40 min and the trachea was collected 16-24 hours after injury for imaging and  
215 explant culture.

216

### 217 ***Tracheal Explant***

218

219 Tracheas were dissected, cleared of connective tissue and adjacent organs, and  
220 opened longitudinally along the anterior tracheal wall. The tracheas were placed on ice  
221 in DMEM/F-12 Media with Primocin (InVivoGen) and 15 mM HEPES until culture.  
222 Trachea explants were then sutured onto a silicone o-ring and placed in a custom-made

223 tissue culture dish over an inverted air-liquid interface (ALI) insert secured in a 60 mm  
224 tissue culture dish by PDMS. This approach ensured stability during high resolution  
225 imaging. The media contacted the explant from below through the ALI membrane. The  
226 dish was placed in a physiological live imaging chamber (CO<sub>2</sub> and temperature-  
227 controlled, TokaiHit) on the stage of the 2-photon microscope.

228

### 229 ***Physiological 2-Photon Imaging***

230

231 Trachea explant imaging was performed on an Olympus FVMPE-RS multiphoton laser  
232 scanning microscope equipped with a MaiTai HPDS-O IR pulsed laser (900 nm for GFP  
233 and SHG) and INSIGHT X3-OL IR pulsed laser (1100 nm for tdTomato), using a 25X  
234 water immersion lens (NA 1.05). Explants were imaged at time points as indicated in the  
235 Figures. For orthogonal view reconstruction, we scanned the trachea with 0.75  $\mu\text{m}$  Z  
236 steps. To reimagine the same trachea at high resolution at different time points,  
237 landmarks such as cartilage rings and vascularity patterns were used as fiducial marks.  
238 These fiducial marks were also used for 2D and 3D registration of different time points.

239

### 240 ***Image Analysis***

241

242 4D images (x,y,z,t) were imported into MATLAB and/or ImageJ for image processing  
243 and analysis. Because the curvature of the tissue changes over time, we first  
244 normalized each 3D image to generate a flat basement membrane. As the SHG signal  
245 is maximal at the basement membrane, we computed the z height of the basement  
246 membrane across the image after applying a Gaussian blur (typical  $\sigma$  values: 10-25  $\mu\text{m}$   
247 in xy, 1-4  $\mu\text{m}$  in z). This height was subtracted from the original 3D data to level the  
248 basement membrane. MATLAB code for flattening the 3D images is available upon  
249 request. Other image processing steps including brightness and contrast adjustments,  
250 background subtraction, photobleaching correction, pseudocoloring, 3D time-lapse  
251 registration, and stitching were performed using built-in functions in ImageJ.

252

253 Cilia beating was recorded by acquiring time-lapse two-photon images of the epithelial  
254 surface at 150 Hz over 200 frames using a resonant galvanometer scanner. To estimate  
255 the cilia beat frequency (CBF), we estimated the power spectral density of the  
256 fluorescence intensity fluctuations across the image using Welch's method in MATLAB.  
257 The peak fluctuation frequency was computed for each pixel across the image  
258 corresponding to bright cilia. Mucociliary transport was measured by applying 1  $\mu\text{m}$   
259 fluorescent spherical beads to the epithelial surface and recording their displacement  
260 over time after equilibration.

261

262 To track individual cells over time-lapse imaging, images were imported into ilastik for  
263 segmentation and cell tracking (Berg et al., 2019). Briefly, pixels corresponding to nuclei  
264 were first classified using manual training and machine learning. Next, individual cells  
265 were similarly identified through manual training and machine learning algorithms to  
266 classify objects. Finally, classified cells were tracked over time using a conservation  
267 tracking algorithm. Segmented and tracked cells were then imported into MATLAB for  
268 quantitative analysis, including computation of individual cell speeds over time.

269

270 For automated estimation of cell speed from time-lapse imaging, we performed  
271 automated particle imaging velocimetry (PIV). Image sequences were imported into  
272 MATLAB and analyzed using the PIVlab plugin (Thielicke and Stamhuis, 2014). A direct  
273 Fourier transform correlation with multiple passes of sizes consisting of 24  $\mu\text{m}$ , 16  $\mu\text{m}$   
274 and 10  $\mu\text{m}$  was used. This generated displacement vectors arranged in a grid with 10  
275  $\mu\text{m}$  spacing for each sequential pair of images. The average cell speed for each time-  
276 point was estimated by computing the average absolute displacement estimated by PIV  
277 in each (10 x 10)  $\mu\text{m}^2$  region divided by the time between images. To quantify the  
278 directionality of cell movement, we computed the circular variance of the displacement  
279 vectors generated by PIV analysis.

280

### 281 ***Kaede Photoconversion***

282

283 Trachea from Kaede mice were explanted 20 hours after SO<sub>2</sub> inhalation injury, sutured  
284 onto a silicone O-ring, and secured on an inverted ALI insert in media on ice, and  
285 placed on the imaging platform of a FV3000 Olympus Laser Scanning confocal  
286 microscope. Selected regions were outlined and photoconverted using the 405 nm laser  
287 for 2 minutes, while both disappearance of KaedeGreen and appearance of KaedeRed  
288 were simultaneously visualized using the 488 nm and the 561 nm lasers, respectively.

289

290 To identify regions of movement and no movement, we explanted Kaede (Tomura et al.,  
291 2008) mouse tracheas 20 hours after SO<sub>2</sub> injury, photoconverted distinct regions with a  
292 specific shape, and proceeded with timelapse live imaging, screening for regions with  
293 significant shape displacement over time (from epithelial movement) (Figure 3a). After  
294 defining whether a region moved or remained non-moving, we excised a trachea  
295 fragment, dissociated the fragment into single cells, and used flow activated cell sorting  
296 (FACS) to isolate photoconverted (KaedeRed) epithelial cells. We then proceeded to  
297 single-cell RNA sequencing of cells isolated from moving and non-moving regions.

298

### 299 ***Cell Dissociation and FACS***

300

301 Airway epithelial cells were dissociated using papain solution. Tracheal fragments with  
302 photoconverted regions were trimmed and incubated in papain dissociation solution and  
303 incubated at 37 °C for 2 hours. After incubation, dissociated tissues were passed  
304 through a cell strainer and centrifuged and pelleted at 500g for 5 min. Cell pellets were  
305 dispersed and incubated with Ovo-mucoid protease inhibitor (Worthington Biochemical,  
306 cat. no. LK003182) to inactivate residual papain activity by incubating on a rocker at  
307 4 °C for 20 min. Cells were then pelleted and stained with EpCAM–BV421 (1:50; BD  
308 Bioscience, #563214) for 30 min in 2.5% FBS in PBS on ice. After washing, cells were  
309 sorted by fluorescence (antibody staining, Kaede-Green and Kaede-Red) on a BD  
310 FACS Aria (BD Biosciences) using FACS Diva software and analysis was performed  
311 using FlowJo (version 10) software.

312

313 Single cells were sorted into each well of a 96-well PCR plate containing 5  $\mu\text{l}$  buffer.  
314 After sorting, the plate was sealed with a Microseal F, centrifuged at 800g for 1 min and

315 immediately frozen on dry ice. Plates were stored at  $-80^{\circ}\text{C}$  and submitted to a core  
316 facility for cDNA library generation, amplification, and sequencing.

317

### 318 ***Single Cell Sequencing and Sequence Analysis***

319

320 cDNA was generated from single cells in the 96-well plate using the SmartSeq v4 kits  
321 (Takara Bio) using 1/4th volume reactions dispensed using a Mantis dispenser  
322 (Formulatrix). Samples were amplified using 18 cycles of PCR. Resulting cDNA was  
323 then made into Illumina-compatible libraries using the Nextera XT kit (Illumina Inc).  
324 Libraries were sequenced on a NextSeq using a Mid Output 150 cycle kit (Illumina Inc.)  
325 using 75bp paired end reads.

326

### 327 ***Pre-processing of plate-based scRNA-seq data***

328

329 BCL files were converted to merged, de-multiplexed FASTQ files using the Illumina  
330 Bcl2Fastq software package v.2.17.1.14. Paired-end reads were mapped to the UCSC  
331 mm10 mouse transcriptome using Bowtie (Langmead et al., 2009) with parameters '-q-  
332 phred33-quals -n 1 -e 99999999 -l 25 -l 1 -X 2000 -a -m 15 -S -p 6', which allows  
333 alignment of sequences with one mismatch. Expression levels of genes were quantified  
334 as transcript-per-million (TPM) values by RSEM (Li and Dewey, 2011) v.1.2.3 in paired-  
335 end mode. For each cell, we determined the number of genes for which at least one  
336 read was mapped, and then excluded all cells with fewer than 1,000 or more than  
337 10,000 detected genes, or less than 25% of reads mapping to the transcriptome.

338

339 To identify variable genes a logistic regression was fit to the cellular detection fraction,  
340 using the total number of transcripts per cell as a predictor. Outliers from this curve are  
341 genes that are expressed in a lower fraction of cells than would be expected given the  
342 total number of transcripts mapping to that gene, that is, cell-type or state-specific  
343 genes. We used a threshold of deviance  $<-0.15$ , producing a set of 1910 variable  
344 genes.

345

### 346 ***Dimensionality reduction by PCA and t-SNE***

347

348 We restricted the expression matrix to the subsets of variable genes and high-quality  
349 cells noted above, and values were  $\log_2$ -transformed, and then centered and scaled  
350 before input to PCA, which was implemented using the R function 'prcomp' from the  
351 'stats' package. After PCA, significant principal components were identified by  
352 inspection of the scree plot. Only scores from the first 20 PCs were used as the input to  
353 further analysis.

354

355 For visualization purposes only (and not for clustering), dimensionality was further  
356 reduced using the Barnes–Hut approximate version of t-SNE (Van Der Maaten, 2014;  
357 van der Maaten, 2008) (Figure 3b). This was implemented using the 'Rtsne' function  
358 from the 'Rtsne' R package.

359



360 To identify cell types within the data, unsupervised hierarchical clustering was used  
361 using the 'Ward.D2' metric in the 'hclust' R package. Pearson's correlation was used as  
362 a distance metric. This produced 3 clusters, 2 were clearly identifiable as Basal and  
363 Club cells, based on disjoint expression of known markers *Krt5* and *Scgb1a1*,  
364 respectively, while the third was distinguished by much lower technical quality (an  
365 average of 2373 genes detected per cell compared to 5193 for the Basal and 5480 for  
366 the club clusters respectively,  $p=0.0004$ , Mann-Whitney U-test). These low-quality cells  
367 were not used for DE testing.

368  
369 To identify the signature of moving vs non-moving basal cells (Figure 3c) we ran  
370 differential expression tests between cells in the Basal cluster between the two  
371 conditions (moving and non-moving), and selected genes that were differentially  
372 expressed (FDR<0.05). Differential expression tests were carried using a two part  
373 'hurdle' model to control for both technical quality and mouse-to-mouse variation. This  
374 was implemented using the R package MAST (Finak et al., 2015), and *P* values for  
375 differential expression were computed using the likelihood-ratio test. Multiple hypothesis  
376 testing correction was performed by controlling the false discovery rate using the R  
377 function 'p.adjust'.

#### 378 379 ***Re-analysis of polidocanol injury dataset***

380  
381 Previously published single-cell RNA sequencing data from mouse trachea injured  
382 using polidocanol (Plasschaert et al., 2018) was downloaded from the NCBI GEO  
383 (GSE102580). All available unique molecular identifier (UMI) counts tables from mice at  
384 24, 48, 72 and 168 hours after injury along with uninjured controls were downloaded.  
385 Cell-types were determined using the authors provided annotations. To determine the  
386 expression of migration-associated genes in the injury response, we scored the Basal  
387 cells for the set of genes (Figure 3c) both significantly up- ('mover') and down-regulated  
388 ('non-mover') (Figure 3d). Scoring cells was computed as described previously (Montoro  
389 et al., 2018). To obtain a score for a specific set of *n* genes in a given cell, a  
390 'background' gene set was defined to control for differences in sequencing coverage  
391 and library complexity. The background gene set was selected for similarity to the  
392 genes of interest in terms of expression level. Specifically, the 10*n* nearest neighbors in  
393 the 2D space defined by mean expression and detection frequency across all cells were  
394 selected. The signature score for that cell was then defined as the mean expression of  
395 the *n* signature genes in that cell, minus the mean expression of the 10*n* background  
396 genes in that cell.

397  
398 Unsupervised cluster analysis of polidocanol-injured basal cells 24 hours after injury  
399 was computed using default settings in Seurat. Briefly, variable genes were selected  
400 using the method 'vst', and then PCA was computed using only these genes. Shared-  
401 nearest neighbor (SNN)-based clustering was implemented using the 'FindClusters'  
402 function (resolution parameter = 0.25) using the first 25 principal components as input,  
403 resulting in two clusters (Figure 3e).

404

405 **Statistical Analysis**

406

407 Data was compared among groups using the Student's *t*-test (unpaired, two-tailed)  
408 unless otherwise specified in the Figure legends. Analysis was performed with  
409 Graphpad Prism software (version 9.1.0).

410

411

412 **Acknowledgements**

413

414 We thank Drs. Jin-ah Park, Jeffrey Fredberg, and Jeffrey Drazen for stimulating  
415 discussion about the migratory behaviors of cells. We thank all of the laboratory of Dr.  
416 Jayaraj Rajagopal for providing the cell type-specific fluorescent reporter mice, access  
417 to advanced microscopy, and critical appraisal of the project. We thank the HSCI-CRM  
418 Flow Cytometry and Microscopy Core Facility at the Massachusetts General Hospital,  
419 and The Bauer Core Facility at Harvard University for facilitating this project.

420

421

422 **Competing interests**

423

424 SJK is currently an employee of and has financial interests in LASE Innovation  
425 Inc. SHY has financial interests in LASE Innovation Inc. that were reviewed and are  
426 managed by Massachusetts General Hospital and Mass General Brigham in  
427 accordance with their conflict-of-interest policies. VV is currently an employee and has  
428 financial interest in Vertex Pharmaceuticals, Inc. All other authors declare they have no  
429 competing interests.

430

431 **References**

432

- 433 Aigouy, B., Farhadifar, R., Staple, D.B., Sagner, A., Röper, J.-C., Jülicher, F., Eaton, S.,  
434 2010. Cell flow reorients the axis of planar polarity in the wing epithelium of  
435 *Drosophila*. *Cell* 142, 773–786.
- 436 Berg, S., Kutra, D., Kroeger, T., Straehle, C.N., Kausler, B.X., Haubold, C., Schiegg, M.,  
437 Ales, J., Beier, T., Rudy, M., Eren, K., Cervantes, J.I., Xu, B., Beuttenmueller, F.,  
438 Wolny, A., Zhang, C., Koethe, U., Hamprecht, F.A., Kreshuk, A., 2019. ilastik:  
439 interactive machine learning for (bio)image analysis. *Nat. Methods* 16, 1226–  
440 1232.
- 441 Besson, S., Dumais, J., 2011. Universal rule for the symmetric division of plant cells.  
442 *Proc. Natl. Acad. Sci. U. S. A.* 108, 6294–6299.
- 443 Borthwick, D.W., Shahbazian, M., Krantz, Q.T., Dorin, J.R., Randell, S.H., 2001.  
444 Evidence for stem-cell niches in the tracheal epithelium. *Am. J. Respir. Cell Mol.*  
445 *Biol.* 24, 662–670.
- 446 Concha, M.L., Adams, R.J., 1998. Oriented cell divisions and cellular morphogenesis in  
447 the zebrafish gastrula and neurula: a time-lapse analysis. *Development* 125,  
448 983–994.
- 449 Diamond, I., Owolabi, T., Marco, M., Lam, C., Glick, A., 2000. Conditional gene  
450 expression in the epidermis of transgenic mice using the tetracycline-regulated

- 451 transactivators tTA and rTA linked to the keratin 5 promoter. *J. Invest. Dermatol.*  
452 115, 788–794.
- 453 Finak, G., McDavid, A., Yajima, M., Deng, J., Gersuk, V., Shalek, A.K., Slichter, C.K.,  
454 Miller, H.W., McElrath, M.J., Prlic, M., Linsley, P.S., Gottardo, R., 2015. MAST: a  
455 flexible statistical framework for assessing transcriptional changes and  
456 characterizing heterogeneity in single-cell RNA sequencing data. *Genome Biol.*  
457 16, 278.
- 458 Fukumoto, J., Soundararajan, R., Leung, J., Cox, R., Mahendrasah, S., Muthavarapu,  
459 N., Herrin, T., Czachor, A., Tan, L.C., Hosseinian, N., Patel, P., Gone, J.,  
460 Breitzig, M.T., Cho, Y., Cooke, A.J., Galam, L., Narala, V.R., Pathak, Y., Lockey,  
461 R.F., Kolliputi, N., 2016. The role of club cell phenoconversion and migration in  
462 idiopathic pulmonary fibrosis. *Aging* 8, 3091–3109.
- 463 Hu, K.H., Eichorst, J.P., McGinnis, C.S., Patterson, D.M., Chow, E.D., Kersten, K.,  
464 Jameson, S.C., Gartner, Z.J., Rao, A.A., Krummel, M.F., 2020. ZipSeq:  
465 barcoding for real-time mapping of single cell transcriptomes. *Nat. Methods* 17,  
466 833–843.
- 467 Kim, J.H., Pegoraro, A.F., Das, A., Koehler, S.A., Ujwary, S.A., Lan, B., Mitchel, J.A.,  
468 Atia, L., He, S., Wang, K., Bi, D., Zaman, M.H., Park, J.-A., Butler, J.P., Lee,  
469 K.H., Starr, J.R., Fredberg, J.J., 2020. Unjamming and collective migration in  
470 MCF10A breast cancer cell lines. *Biochem. Biophys. Res. Commun.* 521, 706–  
471 715.
- 472 Kim, J.K., Vinarsky, V., Wain, J., Zhao, R., Jung, K., Choi, J., Lam, A., Pardo-Saganta,  
473 A., Breton, S., Rajagopal, J., Yun, S.H., 2012. In Vivo Imaging of Tracheal  
474 Epithelial Cells in Mice during Airway Regeneration. *American Journal of*  
475 *Respiratory Cell and Molecular Biology*. [https://doi.org/10.1165/rcmb.2012-](https://doi.org/10.1165/rcmb.2012-0164oc)  
476 0164oc
- 477 Konen, J., Summerbell, E., Dwivedi, B., Galior, K., Hou, Y., Rusnak, L., Chen, A., Saltz,  
478 J., Zhou, W., Boise, L.H., Vertino, P., Cooper, L., Salaita, K., Kowalski, J.,  
479 Marcus, A.I., 2017. Image-guided genomics of phenotypically heterogeneous  
480 populations reveals vascular signalling during symbiotic collective cancer  
481 invasion. *Nat. Commun.* 8, 15078.
- 482 Kumar, P.A., Hu, Y., Yamamoto, Y., Hoe, N.B., Wei, T.S., Mu, D., Sun, Y., Joo, L.S.,  
483 Dagher, R., Zielonka, E.M., Wang, D.Y., Lim, B., Chow, V.T., Crum, C.P., Xian,  
484 W., McKeon, F., 2011. Distal Airway Stem Cells Yield Alveoli In Vitro and during  
485 Lung Regeneration following H1N1 Influenza Infection. *Cell*.  
486 <https://doi.org/10.1016/j.cell.2011.10.001>
- 487 La Manno, G., Soldatov, R., Zeisel, A., Braun, E., Hochgerner, H., Petukhov, V.,  
488 Lidschreiber, K., Kastrioti, M.E., Lönnerberg, P., Furlan, A., Fan, J., Borm, L.E.,  
489 Liu, Z., van Bruggen, D., Guo, J., He, X., Barker, R., Sundström, E., Castelo-  
490 Branco, G., Cramer, P., Adameyko, I., Linnarsson, S., Kharchenko, P.V., 2018.  
491 RNA velocity of single cells. *Nature* 560, 494–498.
- 492 Lane, K., Van Valen, D., DeFelice, M.M., Macklin, D.N., Kudo, T., Jaimovich, A., Carr,  
493 A., Meyer, T., Pe'er, D., Boutet, S.C., Covert, M.W., 2017. Measuring Signaling  
494 and RNA-Seq in the Same Cell Links Gene Expression to Dynamic Patterns of  
495 NF- $\kappa$ B Activation. *Cell Syst* 4, 458-469.e5.

- 496 Langmead, B., Trapnell, C., Pop, M., Salzberg, S.L., 2009. Ultrafast and memory-  
497 efficient alignment of short DNA sequences to the human genome. *Genome Biol.*  
498 10, R25.
- 499 Lee, Y., Bogdanoff, D., Wang, Y., Hartoularos, G.C., Woo, J.M., Mowery, C.T., Nisonoff,  
500 H.M., Lee, D.S., Sun, Y., Lee, J., Mehdizadeh, S., Cantlon, J., Shifrut, E.,  
501 Ngyuen, D.N., Roth, T.L., Song, Y.S., Marson, A., Chow, E.D., Ye, C.J., 2021.  
502 XYZeq: Spatially resolved single-cell RNA sequencing reveals expression  
503 heterogeneity in the tumor microenvironment. *Sci Adv* 7.  
504 <https://doi.org/10.1126/sciadv.abg4755>
- 505 Li, B., Dewey, C.N., 2011. RSEM: accurate transcript quantification from RNA-Seq data  
506 with or without a reference genome. *BMC Bioinformatics* 12, 323.
- 507 Marx, V., 2021. Method of the Year: spatially resolved transcriptomics. *Nat. Methods* 18,  
508 9–14.
- 509 Miller, R.L., Zhang, P., Smith, M., Beaulieu, V., Paunescu, T.G., Brown, D., Breton, S.,  
510 Nelson, R.D., 2005. V-ATPase B1-subunit promoter drives expression of EGFP  
511 in intercalated cells of kidney, clear cells of epididymis and airway cells of lung in  
512 transgenic mice. *Am. J. Physiol. Cell Physiol.* 288, C1134-44.
- 513 Minc, N., Piel, M., 2012. Predicting division plane position and orientation. *Trends Cell*  
514 *Biol.* 22, 193–200.
- 515 Montoro, D.T., Haber, A.L., Biton, M., Vinarsky, V., Lin, B., Birket, S.E., Yuan, F., Chen,  
516 S., Leung, H.M., Villoria, J., Rogel, N., Burgin, G., Tsankov, A.M., Waghray, A.,  
517 Slyper, M., Waldman, J., Nguyen, L., Dionne, D., Rozenblatt-Rosen, O., Tata,  
518 P.R., Mou, H., Shivaraju, M., Bihler, H., Mense, M., Tearney, G.J., Rowe, S.M.,  
519 Engelhardt, J.F., Regev, A., Rajagopal, J., 2018. A revised airway epithelial  
520 hierarchy includes CFTR-expressing ionocytes. *Nature* 560, 319–324.
- 521 Pardo-Saganta, A., Law, B.M., Tata, P.R., Villoria, J., Saez, B., Mou, H., Zhao, R.,  
522 Rajagopal, J., 2015a. Injury induces direct lineage segregation of functionally  
523 distinct airway basal stem/progenitor cell subpopulations. *Cell Stem Cell* 16,  
524 184–197.
- 525 Pardo-Saganta, A., Tata, P.R., Law, B.M., Saez, B., Chow, R.D.-W., Prabhu, M.,  
526 Gridley, T., Rajagopal, J., 2015b. Parent stem cells can serve as niches for their  
527 daughter cells. *Nature* 523, 597–601.
- 528 Park, J.-A., Kim, J.H., Bi, D., Mitchel, J.A., Qazvini, N.T., Tantisira, K., Park, C.Y.,  
529 McGill, M., Kim, S.-H., Gweon, B., Notbohm, J., Steward, R., Jr, Burger, S.,  
530 Randell, S.H., Kho, A.T., Tambe, D.T., Hardin, C., Shore, S.A., Israel, E., Weitz,  
531 D.A., Tschumperlin, D.J., Henske, E.P., Weiss, S.T., Manning, M.L., Butler, J.P.,  
532 Drazen, J.M., Fredberg, J.J., 2015. Unjamming and cell shape in the asthmatic  
533 airway epithelium. *Nat. Mater.* 14, 1040–1048.
- 534 Park, M., Richardson, A., Pandzic, E., Lobo, E.P., Whan, R., Watson, S.L., Lyons, J.G.,  
535 Wakefield, D., Di Girolamo, N., 2019. Visualizing the Contribution of Keratin-14+  
536 Limbal Epithelial Precursors in Corneal Wound Healing. *Stem Cell Reports* 12,  
537 14–28.
- 538 Park, S., Gonzalez, D.G., Guirao, B., Boucher, J.D., Cockburn, K., Marsh, E.D., Mesa,  
539 K.R., Brown, S., Rompolas, P., Haberman, A.M., Bellaïche, Y., Greco, V., 2017.  
540 Tissue-scale coordination of cellular behaviour promotes epidermal wound repair  
541 in live mice. *Nat. Cell Biol.* 19, 155–163.

- 542 Plasschaert, L.W., Žilionis, R., Choo-Wing, R., Savova, V., Knehr, J., Roma, G., Klein,  
543 A.M., Jaffe, A.B., 2018. A single-cell atlas of the airway epithelium reveals the  
544 CFTR-rich pulmonary ionocyte. *Nature* 560, 377–381.
- 545 Rawlins, E.L., Hogan, B.L.M., 2008. Ciliated epithelial cell lifespan in the mouse trachea  
546 and lung. *Am. J. Physiol. Lung Cell. Mol. Physiol.* 295, L231-4.
- 547 Rawlins, E.L., Okubo, T., Xue, Y., Brass, D.M., Auten, R.L., Hasegawa, H., Wang, F.,  
548 Hogan, B.L.M., 2009. The role of Scgb1a1+ Clara cells in the long-term  
549 maintenance and repair of lung airway, but not alveolar, epithelium. *Cell Stem*  
550 *Cell* 4, 525–534.
- 551 Ståhl, P.L., Salmén, F., Vickovic, S., Lundmark, A., Navarro, J.F., Magnusson, J.,  
552 Giacomello, S., Asp, M., Westholm, J.O., Huss, M., Mollbrink, A., Linnarsson, S.,  
553 Codeluppi, S., Borg, Å., Pontén, F., Costea, P.I., Sahlén, P., Mulder, J.,  
554 Bergmann, O., Lundeberg, J., Frisén, J., 2016. Visualization and analysis of gene  
555 expression in tissue sections by spatial transcriptomics. *Science* 353, 78–82.
- 556 Tadokoro, T., Wang, Y., Barak, L.S., Bai, Y., Randell, S.H., Hogan, B.L.M., 2014. IL-  
557 6/STAT3 promotes regeneration of airway ciliated cells from basal stem cells.  
558 *Proc. Natl. Acad. Sci. U. S. A.* 111, E3641-3649.
- 559 Thielicke, W., Stamhuis, E.J., 2014. PIVlab – Towards User-friendly, Affordable and  
560 Accurate Digital Particle Image Velocimetry in MATLAB. *Journal of Open*  
561 *Research Software*. <https://doi.org/10.5334/jors.bl>
- 562 Tomura, M., Yoshida, N., Tanaka, J., Karasawa, S., Miwa, Y., Miyawaki, A., Kanagawa,  
563 O., 2008. Monitoring cellular movement in vivo with photoconvertible  
564 fluorescence protein “Kaede” transgenic mice. *Proc. Natl. Acad. Sci. U. S. A.*  
565 105, 10871–10876.
- 566 Tsou, M.-F.B., Ku, W., Hayashi, A., Rose, L.S., 2003. PAR-dependent and geometry-  
567 dependent mechanisms of spindle positioning. *J. Cell Biol.* 160, 845–855.
- 568 Van Der Maaten, L., 2014. Accelerating t-SNE using tree-based algorithms. *J. Mach.*  
569 *Learn. Res.* 15, 3221–3245.
- 570 van der Maaten, L., 2008. Visualizing Data using t-SNE [WWW Document]. URL  
571 [https://www.jmlr.org/papers/volume9/vandermaaten08a/vandermaaten08a.pdf?fb](https://www.jmlr.org/papers/volume9/vandermaaten08a/vandermaaten08a.pdf?fbclid=IwAR0Bgg1eA5TFmqOZeCQXsloL6PKrVXUFaskUKtg6yBhVXAFFvZA6yQiYx-M)  
572 [clid=IwAR0Bgg1eA5TFmqOZeCQXsloL6PKrVXUFaskUKtg6yBhVXAFFvZA6yQi](https://www.jmlr.org/papers/volume9/vandermaaten08a/vandermaaten08a.pdf?fbclid=IwAR0Bgg1eA5TFmqOZeCQXsloL6PKrVXUFaskUKtg6yBhVXAFFvZA6yQiYx-M)  
573 [Yx-M](https://www.jmlr.org/papers/volume9/vandermaaten08a/vandermaaten08a.pdf?fbclid=IwAR0Bgg1eA5TFmqOZeCQXsloL6PKrVXUFaskUKtg6yBhVXAFFvZA6yQiYx-M) (accessed 2.23.21).
- 574 Yuan, J., Sheng, J., Sims, P.A., 2018. SCOPE-Seq: a scalable technology for linking  
575 live cell imaging and single-cell RNA sequencing. *Genome Biol.* 19, 227.
- 576 Zhang, Y., Huang, G., Shornick, L.P., Roswit, W.T., Shipley, J.M., Brody, S.L.,  
577 Holtzman, M.J., 2007. A transgenic FOXJ1-Cre system for gene inactivation in  
578 ciliated epithelial cells. *Am. J. Respir. Cell Mol. Biol.* 36, 515–519.

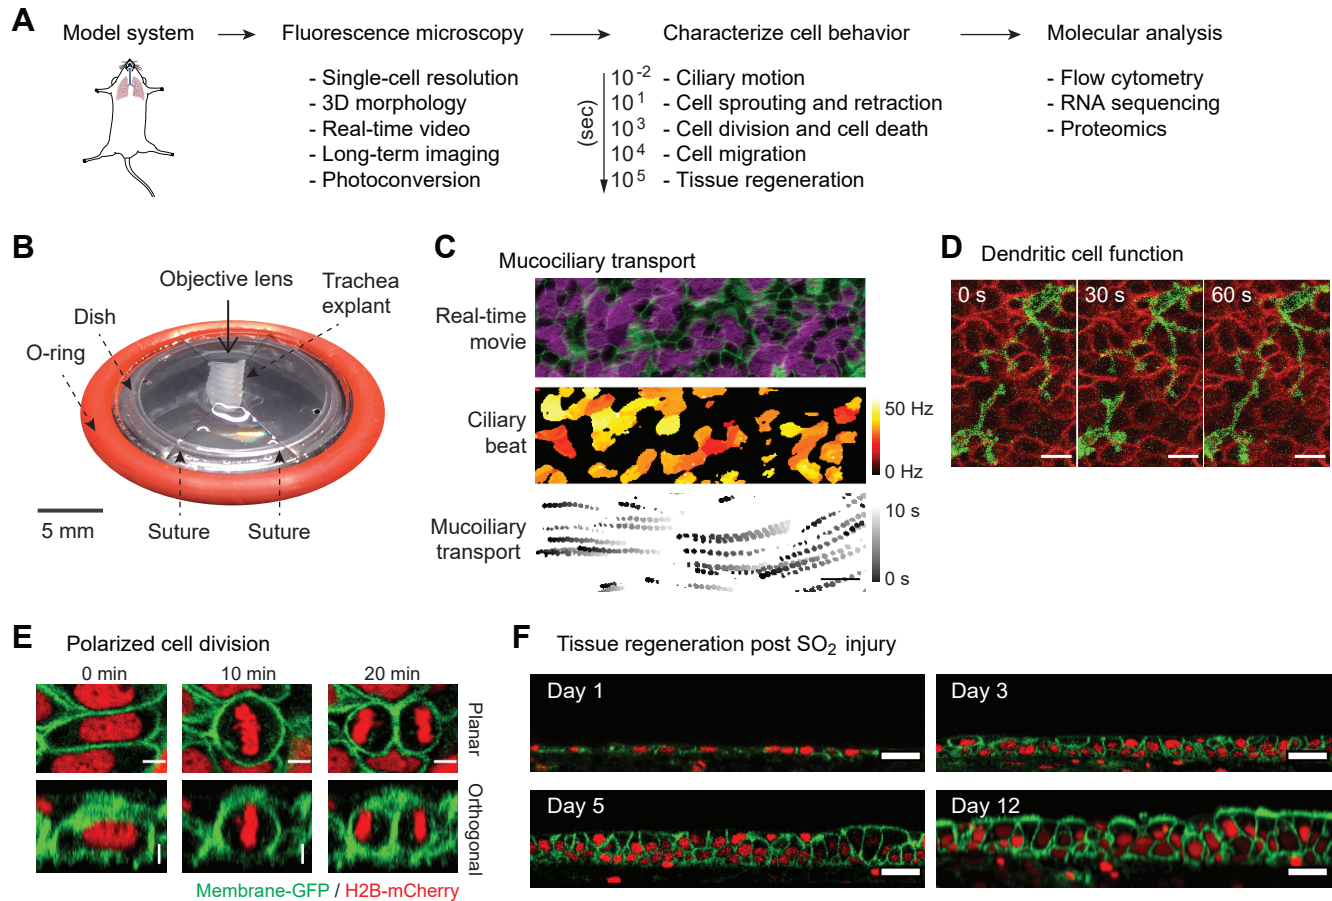

**Figure 1. Platform for live imaging of airway tissue.** (A) Behavioral transcriptomics workflow, starting with imaging, followed by image analysis to characterize cellular behavior over different time frames, leading to single cell applications. (B) Airway tissue (trachea) is explanted from a mouse and affixed to a custom platform for long-term air-liquid-interface (ALI) culture and imaging. The platform enables both time-lapse microscopy and downstream single-cell applications. (C) Imaging and image analysis of ciliary beating and mucociliary transport 1  $\mu$ m spherical beads. (D) Intraepithelial dendritic cells (CD11cCre-MTMG) grow and retract dendrites in real time; scale bar = 5  $\mu$ m (E) Selected snapshots of cell division during regeneration post SO<sub>2</sub> injury. Epithelial cell divides along its long axis during regeneration (Hertwig's rule); scale bar = 5  $\mu$ m. (F) Long-term ALI culture enables imaging of tissue regeneration post SO<sub>2</sub> injury over > 12 days. ALI culture enables regeneration of entire epithelial thickness; scale bar = 20  $\mu$ m. Green = membrane-GFP; red = nuclear-tdTomato.

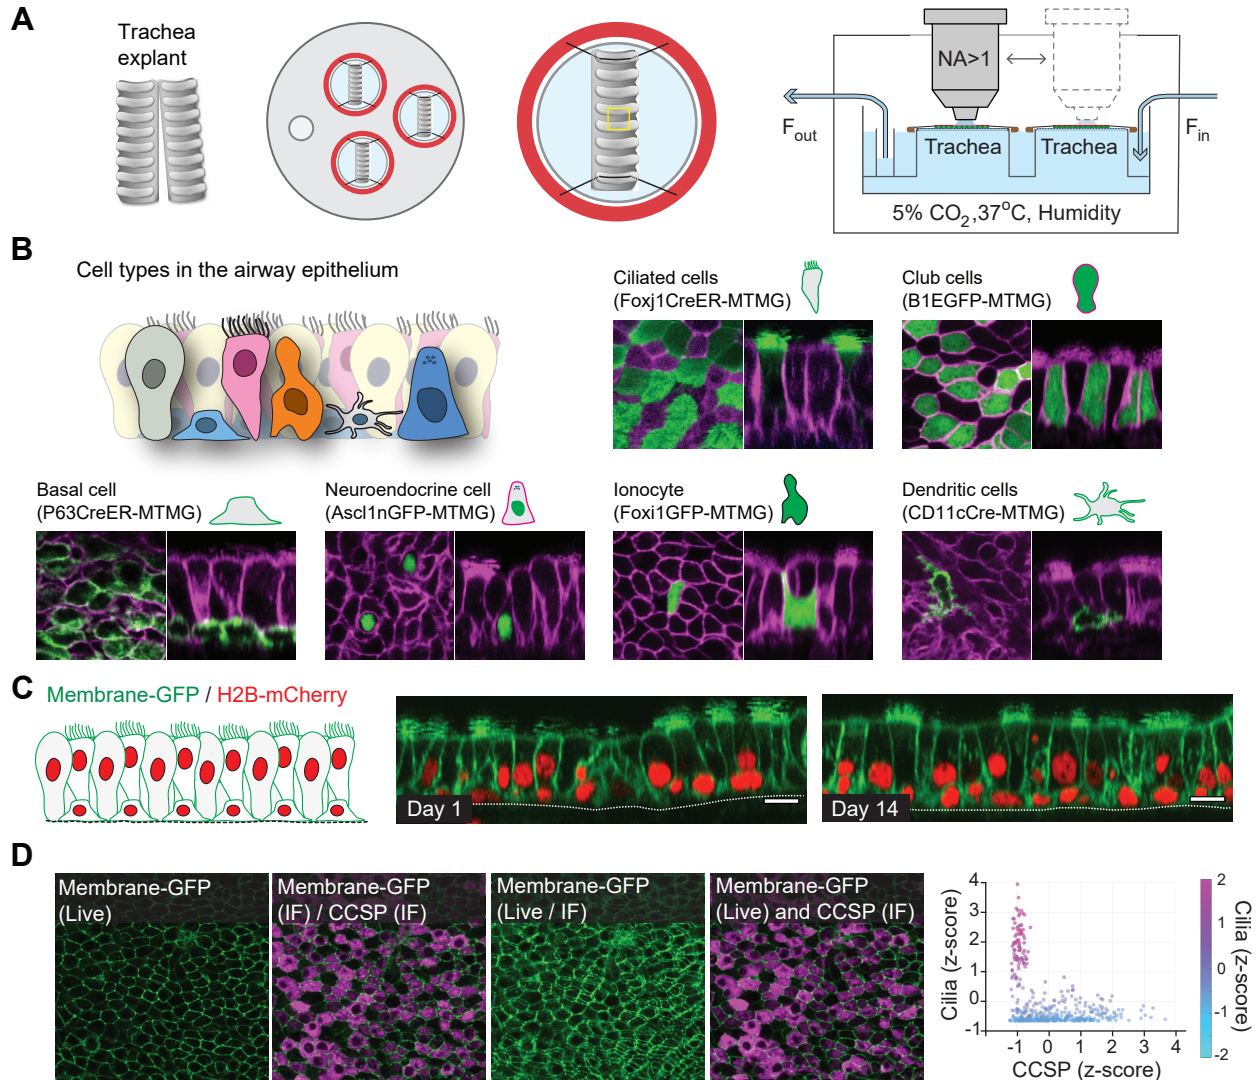

**Figure 1 – figure supplement 1. Platform for live imaging of airway tissue.** (A) Detailed schematic of ALI platform for airway tissue imaging. The platform enables imaging of multiple tissue explants at a time in a controlled environment maintaining ALI, temperature, humidity, and CO<sub>2</sub> content. (B) Representative images of airway epithelial cells using different transgenic mouse models including fluorescent reporters for ciliated, club, basal, neuroendocrine, ionocyte, and dendritic cells. Green = cell type-specific GFP reporter; magenta = membrane-tdTomato. Scale bar = 10 μm. (C) Representative two-photon images of the same airway tissue explanted from a membrane-GFP/H2B-mCherry transgenic mouse at day 1 and day 14 in ALI culture. Scale bar = 10 μm. (D) Registration of live imaging with post-fixation-staining imaging using in silico tissue flattening followed by non-rigid 3D registration. Ciliated cells identified by live imaging were found to have low CCSP expression, while cells with high CCSP expression tended to have no cilia.

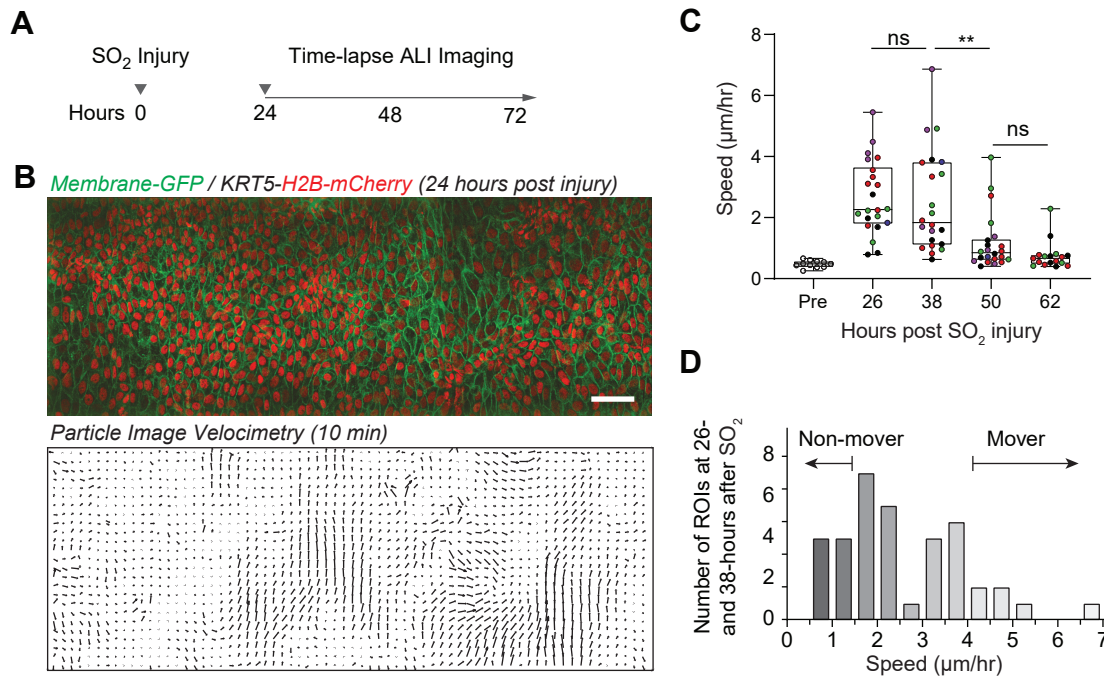

**Figure 2. Live imaging enables observation of movement of regenerating airway epithelial cells.** (A) Experimental design: tracheas are explanted 24 hours post SO<sub>2</sub> injury for continuous time-lapse imaging. (B) Two-photon imaging of trachea epithelium from membrane-GFP, KRT5-H2B-mCherry transgenic mouse. Top image is a stitch of three areas. Bottom image shows displacement vectors over 10 minutes computed using particle image velocimetry (PIV). Scale bar = 50 μm. (C) Computed speed of epithelial cells measured at different time points post SO<sub>2</sub> injury in 22 independent regions from a total of 5 mice at 4 different time points (mouse origin is color-coded). A two-way ANOVA was run to examine the effect of time post SO<sub>2</sub> injury and different mice on the mean speed determined by PIV. There were 22 ROIs analyzed from 5 mice over 4 time-points. There was a significant interaction between time and the mean speed,  $F(2.219,42.91)=16.12$ ,  $p < 0.0001$ , but no significant difference between mouse and mean speed,  $F(4,17)=2.193$ ,  $p=0.113$ . A Tukey post-hoc test revealed significant pairwise differences between 26 and 50 hr, 26 and 62 hr, 38 and 50 hr, as well as 38 and 62 hr. \*\*  $p < 0.01$ . (D) Frequency distribution of injury-induced cell movements measured at 26- and 38-hours after injury identifies “mover” and “non-mover” regions.



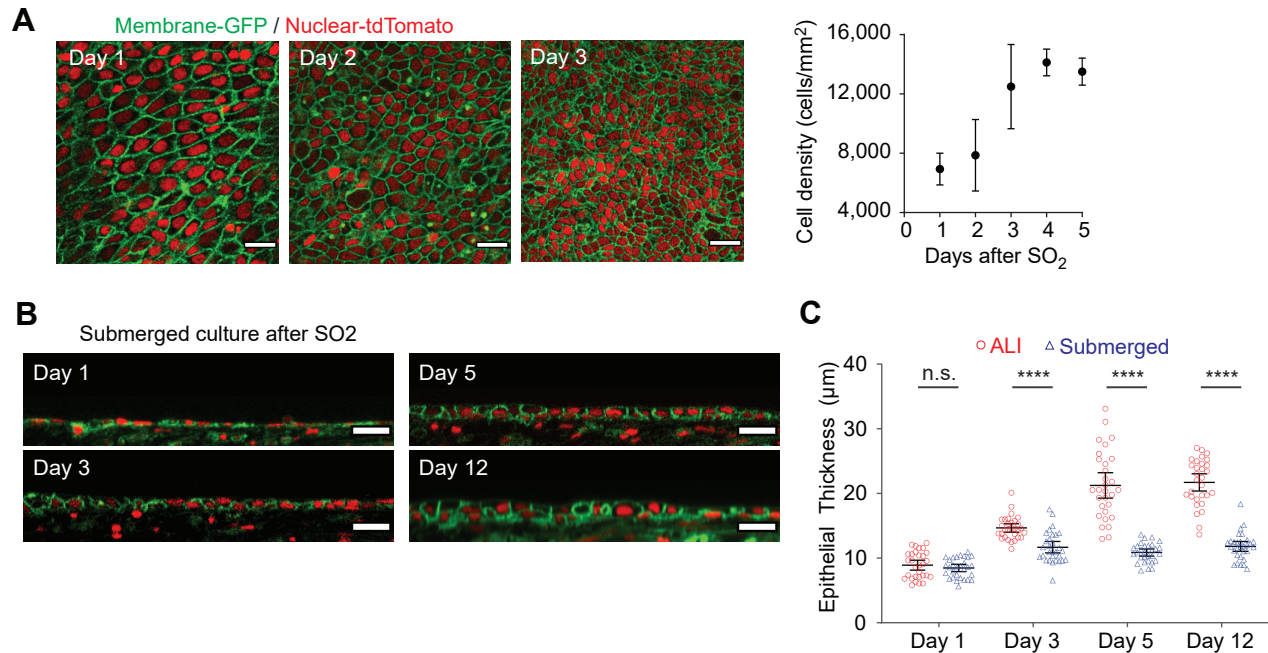

**Figure 2 – figure supplement 1. Epithelial regeneration after sulfur dioxide injury ex vivo.** (A) Quantification of cell density measured post SO<sub>2</sub> injury using membrane-GFP/nuclear-tdTomato mice. Scale bar = 20 μm. n=5, error bars indicate the standard deviation. (B) Long-term imaging of tissue regeneration post SO<sub>2</sub> injury in a submerged culture condition. (C) Comparison of tissue regeneration between ALI and submerged culture. Compared to submerged culture, ALI culture enables regeneration of the full epithelial thickness. Green = membrane-GFP; red = nuclear tdTomato. Error bars indicate the 95% confidence intervals. \*\*\*\* p < 0.0001.

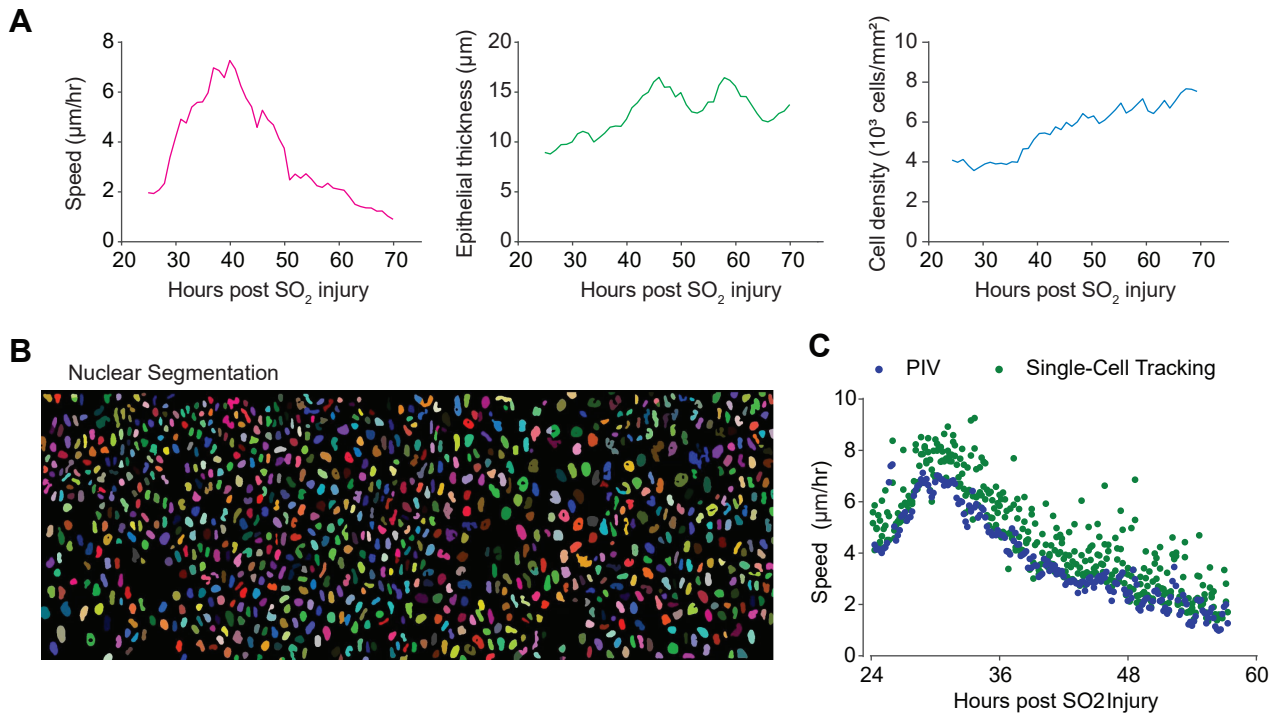

**Figure 2 – figure supplement 2. Live imaging enables quantitative analysis of epithelial cell movement over time.** (A) Quantification of key parameters quantified by time-lapse imaging of the regenerating epithelium, including speed, epithelial thickness, and cell density. (B) Nuclear segmentation of epithelial cells from KRT5rtTA-H2BmCherry transgenic mouse. (C) Speed of moving cells from time-lapse microscopy computed by particle-imaging-velocimetry (PIV) and single-cell tracking of segmented nuclei. There is no significant difference in the computed speed using different methods.

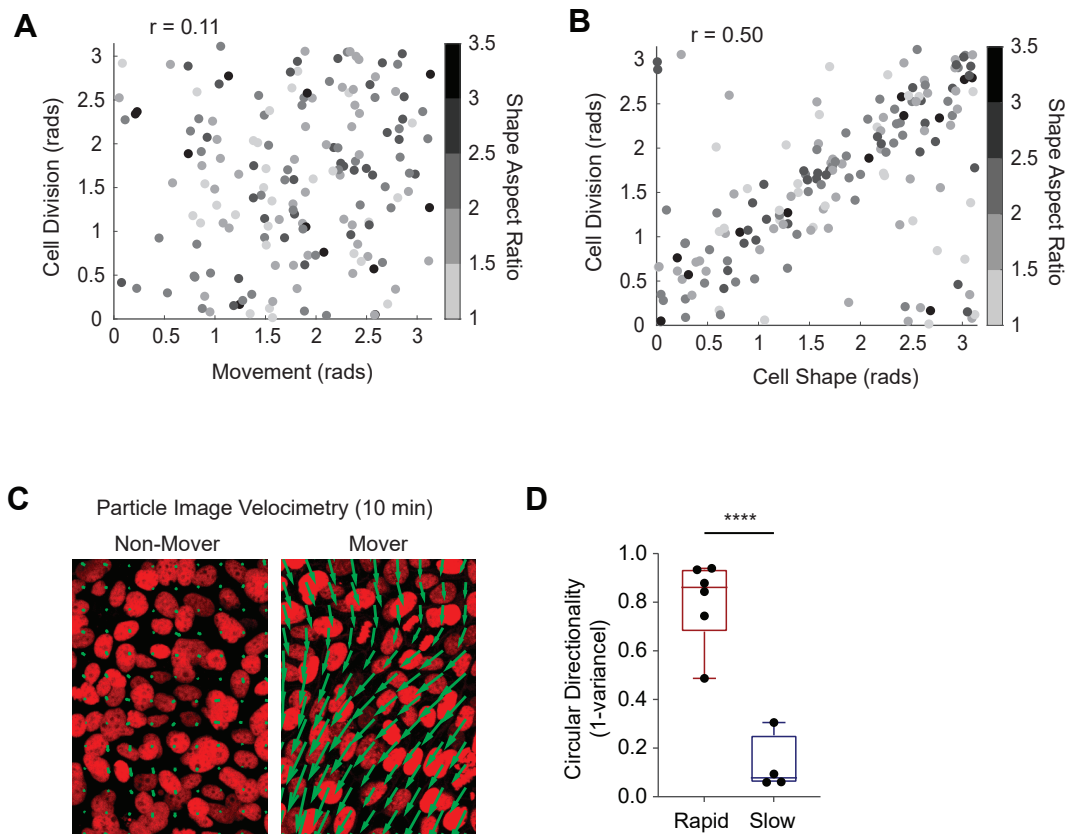

**Figure 2 – figure supplement 3. Live imaging with high temporal resolution.**

(A) Quantification of cell division behaviors during regeneration. The axis of cell division was found to have minimal correlation ( $r=0.11$ ) with local movement, (B) but a moderate correlation with the long axis of the cell ( $r=0.50$ ). (C) Representative movement vectors computed from PIV analysis for a rapid “mover” and a slow “non-mover” region. (D) Cell movement vectors computed from PIV analysis were fit to a von Mises distribution to compute the circular variance. Fast moving cells had a low circular variance (directional), while slow moving cells had a high circular variance (no directional preference). \*\*\*\*  $p < 0.0001$ .

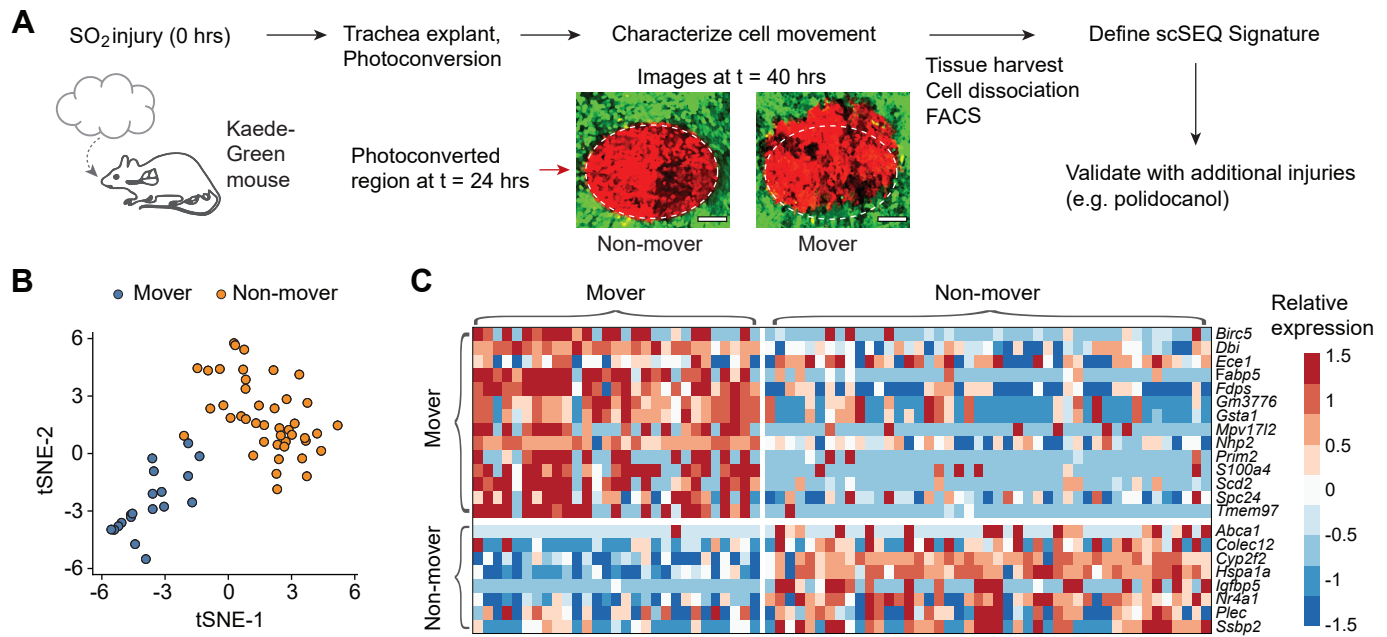

**Figure 3. Transcriptionally distinct moving (M) and non-moving (NM) cells coordinate early airway epithelial regeneration across multiple injury types.** (a) Experimental design: tracheas are explanted 24 hours post SO<sub>2</sub> injury (24 hpi) for continuous time-lapse two-photon imaging. Distinct cellular phenotypes are observed and labeled by photo-conversion for subsequent isolation and transcriptional analysis by full-length single-cell RNA-sequencing. Scale bar = 100 μm (b) Unsupervised clustering of regenerating cells partitions mover and non-mover cell phenotypes. (c) Heatmap of transcriptional signatures of mover and non-mover cells.

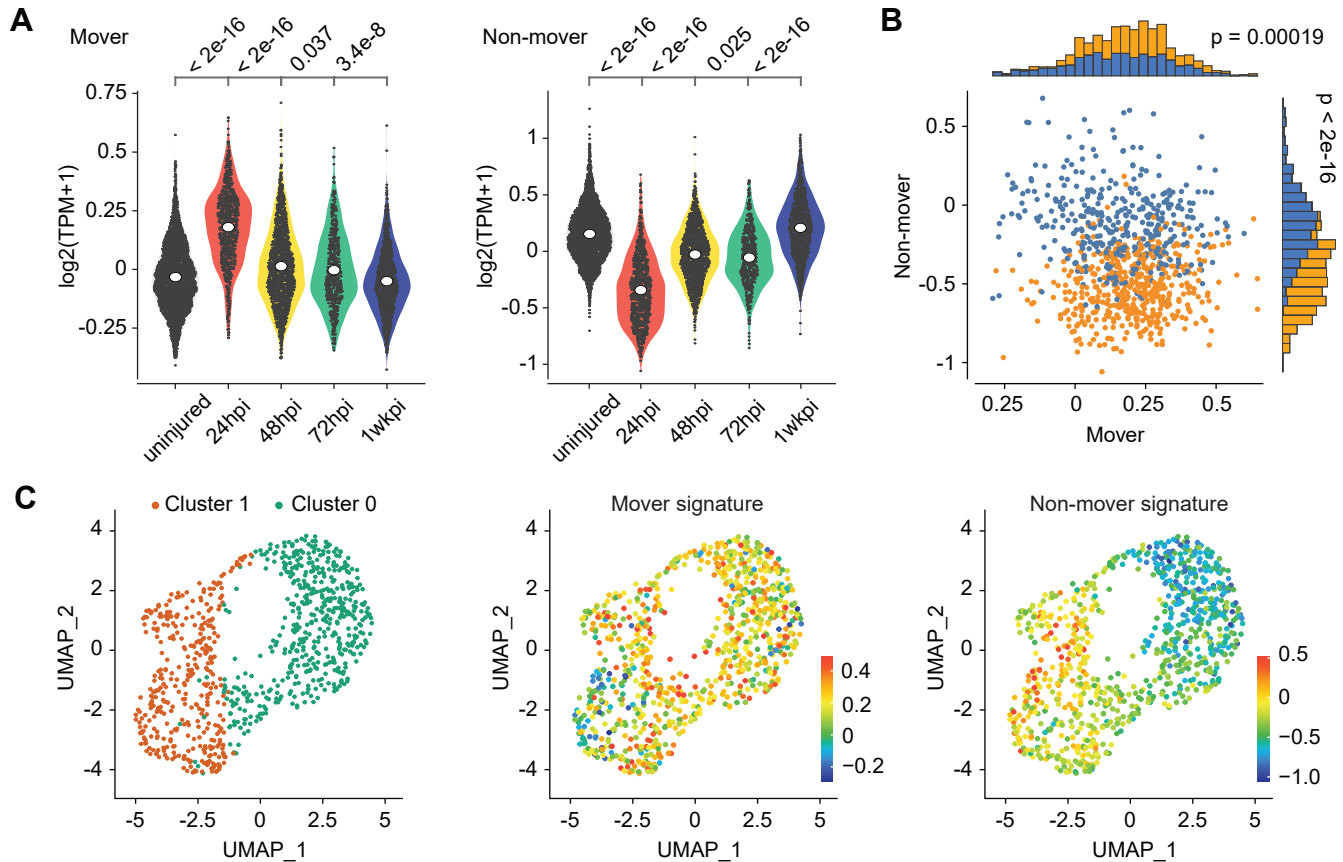

**Figure 4. Transcriptionally distinct moving (M) and non-moving (NM) cells coordinate early airway epithelial regeneration across multiple injury types. (A)** Mover and non-mover transcriptional signatures are also enriched in early airway epithelial regeneration 24hours post-injury of an independent murine airway injury induced by polidocanol administration. **(B)** Scoring for mover and non-mover transcriptional signatures in 24hpi regenerating cells following polidocanol treatment partitions cells into two populations. **(C)** Unsupervised clustering of 24 hpi regenerating cells yields two cell populations enriched in the expression of mover (cluster 0) or non-mover (cluster 1) signatures. *P* values from Mann-Whitney U test.
